# Supplementary material for: Decreased water exchange rate across blood–brain barrier in hereditary cerebral small vessel disease
Source: PubMed Central journal article supplement — Brain. 2023 Jan 10;146(7):3079–87. doi: 10.1093/brain/awac500 (PMC10316759; doi:10.1093/brain/awac500), 2023-01-10
Supplement: awac500_supplementary_data.pdf [file awac500_supplementary_data.pdf]

Supplementary Fig.1 Comparison of FLAIR, T1 weighted images, blood-brain barrier water exchange ( $k_w$ ), cerebral blood flow (CBF) and arterial transit time (ATT) maps of a representative patient with heterozygous HTRA1 mutation related CSVD (27-year-old male) (top row), a patient with CADASIL (29-year-old male) (middle row) and a healthy control (28-year-old female) (bottom row). Decreased  $k_w$ , CBF and increased ATT can be observed in the heterozygous HTRA1 mutation related patient and CADASIL patient. In the patient with heterozygous HTRA1 mutation related CSVD: average  $k_w$  = 88.3 min<sup>-1</sup>, average CBF = 35.5 ml/100g/min, average ATT = 1249.7 ms; in the patient with CADASIL: average  $k_w$  = 115.2 min<sup>-1</sup>, average CBF = 40.0 ml/100g/min, average ATT = 1237.6 ms; in the healthy control: average  $k_w$  = 143.8 min<sup>-1</sup>, average CBF = 65.5 ml/100g/min, average ATT = 1161.7ms.

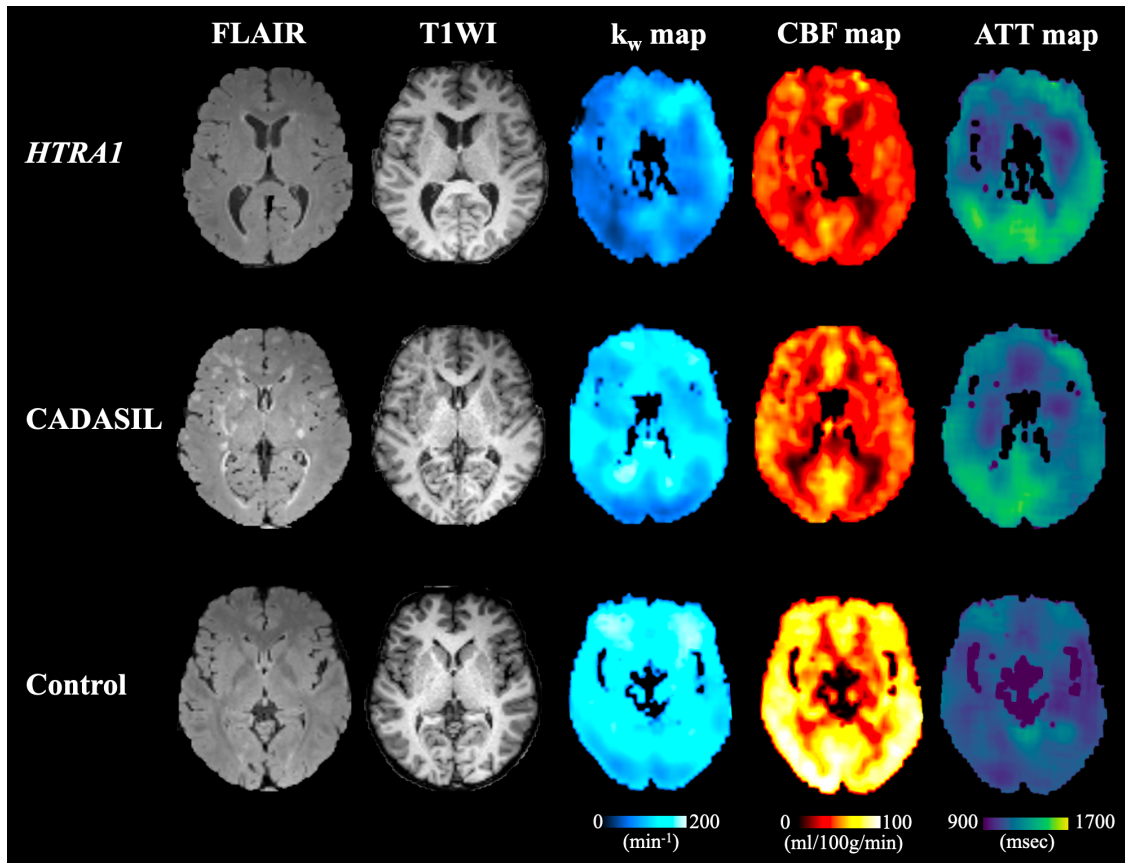

**Supplementary Table 1** Details of gene mutation of **CADASIL** group and heterozygous **HTRA1** mutation related

**CSVD group**

| <b>Types of gene mutation</b>      | <b>Number</b> |
|------------------------------------|---------------|
| <b>NOTCH3 variant</b>              |               |
| c.709G>A, p.Val237Met              | 1             |
| c.505C>T, p.Arg169Cys              | 1             |
| c.499C>T, p.Pro167Ser              | 3             |
| c.421C>T, p.Arg141Cys              | 3             |
| c.328C>T, p.Arg110Cys              | 1             |
| c.268C>T, p.Arg90Cys               | 2             |
| c.226T>C, p.Cys76Arg               | 1             |
| c.3226C>T, p.Arg337Cys             | 1             |
| c.1819C>T, p.Arg607Cys             | 6             |
| c.1645C>T, p.Cys549Ser             | 1             |
| c.1630C>T, p.Arg544Cys             | 3             |
| c.1010A>G, p.Tyr337Cys             | 1             |
| <b>Heterozygous HTRA1 mutation</b> |               |
| c.954G>C, p.Gln318His              | 7             |
| c.835G>A, p.Val279Met              | 2             |

**Supplementary Table 2 Cognitive data for HC group, CADASIL group and heterozygous HTRA1 mutation related CSVD group**

**Table 2A, Compared neuropsychological test scores between CADASIL group, heterozygous HTRA1 mutation related CSVD group and HC group**

| Neuropsychological test | HC           | CADASIL      | HTRA1        | P value |
|-------------------------|--------------|--------------|--------------|---------|
| <b>MMSE</b>             | 28.00 (1.00) | 29.00 (2.00) | 28.00 (6.00) | 0.914   |
| <b>HAMD</b>             | 2.50 (3.25)  | 1.00 (5.50)  | 5.22 ± 4.92  | 0.467   |

**Table 2B, Compared neuropsychological test scores between heterozygous HTRA1 mutation related CSVD group and HC group**

| Neuropsychological test | HTRA1       | HC          | P value |
|-------------------------|-------------|-------------|---------|
| <b>MoCA subdomains</b>  |             |             |         |
| Visuospatial/           | 3.00 ± 1.87 | 5.00 (1.00) | 0.018   |
| Executive Naming        | 3.00 (0.00) | 3.00 (0.75) | 0.105   |
| score Attention         | 5.00 (4.00) | 6.00 (1.00) | 0.007   |
| score Language score    | 3.00 (2.00) | 2.00 (1.00) | 0.492   |
| Abstraction score       | 2.00 (0.00) | 2.00 (1.00) | 0.078   |
| Delayed recall score    | 2.95 ± 1.67 | 3.00 (2.00) | 0.468   |
| Orientation score       | 6.00 (1.00) | 6.00 (0.75) | 0.900   |

**Table 2C, Compared neuropsychological test scores between CADASIL group and HC group**

| Neuropsychological test        | CADASIL        | HC            | P value |
|--------------------------------|----------------|---------------|---------|
| <b>Executive function TMT-</b> |                |               |         |
| A, second                      | 49.71 ± 21.94  | 50.00 (42.00) | 0.465   |
| TMT-B, second                  | 121.83 ± 50.36 | 98.26 ± 33.19 | 0.107   |
| DST (backward)                 | 3.38 ± 2.06    | 5.40 ± 2.21   | 0.004   |
| Stroop interference, second    | 77.00 ± 20.93  | 59.91 ± 13.01 | 0.010   |
| <b>Visuospatial ability</b>    |                |               |         |
| Rey-copy                       | 33.5 (8.25)    | 35.00 (2.00)  | 0.066   |
| Rey-memory                     | 18.42 ± 9.16   | 19.92 ± 7.79  | 0.593   |
| <b>Language</b>                |                |               |         |
| Boston naming                  | 26.00 (7.00)   | 22.68 ± 3.64  | 0.208   |
| Verbal fluency-animal          | 15.52 ± 6.36   | 18.95 ± 6.42  | 0.095   |
| <b>Memory</b>                  |                |               |         |
| AVLT-immediate recall          | 6.04 ± 2.14    | 7.15 ± 1.73   | 0.043   |
| AVLT-short delayed recall      | 7.00 ± 2.72    | 8.00 ± 2.85   | 0.098   |
| AVLT-long delayed recall       | 6.41 ± 2.74    | 8.06 ± 2.86   | 0.017   |

Note: Data were presented as mean ± SD or median (interquartile range). Abbreviations: HC: healthy controls; MMSE: Mini-Mental State Examination; HAMD: Hamilton Depression Scale; MoCA: Montreal Cognitive Assessment; TMT: Trail-Making Test; DST: Digit Span Task; AVLT: Auditory Verbal Learning Test.

**Supplementary Table 3 Compared CBF (ml/100g/min) between CADASIL group, heterozygous HTRA1 mutation related CSVD group and HC group**

| <b>Brain regions</b> | <b>HC</b>     | <b>CADASIL</b> | <b>HTRA1</b>  | <b>P value</b>         |
|----------------------|---------------|----------------|---------------|------------------------|
| Whole brain          | 47.95 (12.98) | 38.09 ± 12.63  | 32.12 ± 9.00  | < 0.001 <sup>a,b</sup> |
| NAWM                 | 42.68 (12.29) | 31.11 ± 11.28  | 23.94 ± 3.90  | < 0.001 <sup>a,b</sup> |
| Frontal lobe         | 44.50 ± 11.08 | 30.86 ± 11.35  | 28.33 ± 8.27  | < 0.001 <sup>a,b</sup> |
| Parietal lobe        | 35.47 (16.11) | 23.38 (12.78)  | 23.37 ± 8.12  | 0.001 <sup>a,b</sup>   |
| Temporal lobe        | 48.88 (11.60) | 37.39 ± 13.32  | 32.36 ± 9.44  | < 0.001 <sup>a,b</sup> |
| Caudate nucleus      | 30.16 ± 8.32  | 24.67 ± 10.05  | 19.85 (12.83) | 0.024 <sup>a</sup>     |
| Putamen              | 43.86 (10.12) | 38.27 ± 10.97  | 35.76 ± 7.40  | 0.033                  |

Note: Data are mean ± SD or median (IQR). Abbreviations: HC: healthy controls; CBF = cerebral blood flow.

Symbols:

- a. for the comparison between the CADASIL and HC (Bonferroni -corrected  $p < 0.05$ ).
- b. for the comparison between the HTRA1 and HC (Bonferroni -corrected  $p < 0.05$ ).
- c. for the comparison between the CADASIL and HTRA1 (Bonferroni -corrected  $p < 0.05$ ).

**Supplementary Table 4 Compared ATT (ms) between CADASIL group, heterozygous HTRA1 mutation related CSVD group and HC group**

| <b>Brain regions</b> | <b>HC</b>        | <b>CADASIL</b>   | <b>HTRA1</b>     | <b>P value</b>       |
|----------------------|------------------|------------------|------------------|----------------------|
| Whole brain          | 1191.40 (165.55) | 1328.76 ± 163.97 | 1375.02 ± 137.92 | 0.022                |
| NAWM                 | 1086.89 (169.87) | 1174.40 ± 148.91 | 1257.18 ± 117.41 | 0.177                |
| Frontal lobe         | 1028.74 (156.17) | 1000.43 ± 162.95 | 1071.63 ± 163.06 | 0.602                |
| Parietal lobe        | 949.24 ± 207.79  | 1015.88 ± 236.45 | 1082.65 ± 225.79 | 0.302                |
| Temporal lobe        | 982.48 (197.60)  | 1133.56 ± 183.86 | 1244.08 ± 128.09 | 0.003 <sup>a,b</sup> |
| Caudate nucleus      | 974.60 (133.87)  | 987.90 ± 145.97  | 1067.18 ± 109.05 | 0.271                |
| Putamen              | 1106.49 (143.79) | 1219.92 ± 154.73 | 1255.60 ± 182.39 | 0.173                |

Note: Data are mean ± SD or median (IQR). Abbreviations: HC: healthy controls; ATT = arterial transit time.

Symbols:

- a. for the comparison between the CADASIL and HC (Bonferroni -corrected  $p < 0.05$ ).
- b. for the comparison between the HTRA1 and HC (Bonferroni -corrected  $p < 0.05$ ).
- c. for the comparison between the CADASIL and HTRA1 (Bonferroni -corrected  $p < 0.05$ ).

**Supplement Table 5 Multiple linear regression analysis of neuropsychological performance and  $k_w$  in CADASIL group**

|                                                 | Brain region  | $\beta$ | P value | 95% CI        |
|-------------------------------------------------|---------------|---------|---------|---------------|
| <b>CADASIL</b>                                  |               |         |         |               |
| AVLT-immediate recall                           |               |         |         |               |
|                                                 | Whole brain   | 0.334   | 0.013   | 0.008 - 0.059 |
|                                                 | NAWM          | 0.345   | 0.009   | 0.011 - 0.064 |
|                                                 | Temporal lobe | 0.284   | 0.045   | 0.001 - 0.056 |
|                                                 | Putamen       | 0.366   | 0.003   | 0.017 - 0.072 |
| AVLT-long delayed recall                        |               |         |         |               |
|                                                 | Whole brain   | 0.458   | 0.001   | 0.026 - 0.092 |
|                                                 | NAWM          | 0.474   | 0.001   | 0.032 - 0.101 |
|                                                 | Frontal lobe  | 0.401   | 0.004   | 0.018 - 0.082 |
|                                                 | Temporal lobe | 0.413   | 0.007   | 0.016 - 0.090 |
|                                                 | Putamen       | 0.480   | < 0.001 | 0.040 - 0.110 |
| <b>Heterozygous HTRA1 mutation related CSVD</b> |               |         |         |               |
| Attention score                                 |               |         |         |               |
|                                                 | Whole brain   | 0.844   | 0.008   | 0.020 - 0.089 |
|                                                 | NAWM          | 0.814   | 0.014   | 0.017 - 0.101 |
|                                                 | Frontal lobe  | 0.813   | 0.014   | 0.018 - 0.110 |
|                                                 | Parietal lobe | 0.822   | 0.012   | 0.024 - 0.130 |
|                                                 | Temporal lobe | 0.821   | 0.012   | 0.019 - 0.108 |

Abbreviations: AVLT: Auditory Verbal Learning Test.

Note: The multivariate linear regression (stepwise) was performed to correct the age, gender, and education level, and the Bonferroni correction was used to correct the number of ROI and cognitive function domains. For CADASIL group, the corrected  $p = 0.05 / (5*2) = 0.005$ ; for HTRA1 group, the corrected  $p = 0.05 / (5*1) = 0.01$ .
